# Supplementary material for: Burden of Acute-Care Hospitalization for Community-Acquired Pneumonia in Canadian Adults Aged 50 Years or Older: Focusing on Most Responsible Diagnosis Tells Only Part of the Story
Source: MDPI journal article supplement (doi:10.3390/vaccines11040748), 2023-03-28
Supplement: s1 [file s1]

**Supplementary Table S1: ICD-10-CA diagnosis codes for all-cause CAP hospitalizations**

| ICD-10-CA Codes                  | ICD-10-CA Codes Description                                           |
|----------------------------------|-----------------------------------------------------------------------|
| <b>ALL-CAUSE PNEUMONIA (CAP)</b> |                                                                       |
| J10.0                            | Influenza with pneumonia, seasonal influenza virus identified         |
| J11.0                            | Influenza with pneumonia, virus not identified                        |
| J12                              | Viral pneumonia, not elsewhere classified                             |
| J12.0                            | Adenoviral pneumonia                                                  |
| J12.1                            | Respiratory syncytial virus pneumonia                                 |
| J12.2                            | Parainfluenza virus pneumonia                                         |
| J12.3                            | Human metapneumovirus pneumonia                                       |
| J12.8                            | Other viral pneumonia                                                 |
| J12.9                            | Viral pneumonia, unspecified                                          |
| J13                              | Pneumonia due to Streptococcus pneumoniae                             |
| J14                              | Pneumonia due to Haemophilus influenzae                               |
| J15                              | Bacterial pneumonia, not elsewhere classified                         |
| J15.0                            | Pneumonia due to Klebsiella pneumoniae                                |
| J15.1                            | Pneumonia due to Pseudomonas                                          |
| J15.2                            | Pneumonia due to staphylococcus                                       |
| J15.3                            | Pneumonia due to streptococcus, group B                               |
| J15.4                            | Pneumonia due to other streptococci                                   |
| J15.5                            | Pneumonia due to Escherichia coli                                     |
| J15.6                            | Pneumonia due to other Gram-negative bacteria                         |
| J15.7                            | Pneumonia due to Mycoplasma pneumoniae                                |
| J15.8                            | Other bacterial pneumonia                                             |
| J15.9                            | Bacterial pneumonia, unspecified                                      |
| J16                              | Pneumonia due to other infectious organisms, not elsewhere classified |
| J16.0                            | Chlamydial pneumonia                                                  |
| J16.8                            | Pneumonia due to other specified infectious organisms                 |

|       |                                                      |
|-------|------------------------------------------------------|
| J17   | Pneumonia in diseases classified elsewhere           |
| J17.0 | Pneumonia in bacterial diseases classified elsewhere |
| J17.1 | Pneumonia in viral diseases classified elsewhere     |
| J17.2 | Pneumonia in mycoses                                 |
| J17.3 | Pneumonia in parasitic diseases                      |
| J17.8 | Pneumonia in other diseases classified elsewhere     |
| J18   | Pneumonia, organism unspecified                      |
| J18.0 | Bronchopneumonia, unspecified                        |
| J18.1 | Lobar pneumonia, unspecified                         |
| J18.2 | Hypostatic pneumonia, unspecified                    |
| J18.8 | Other pneumonia, organism unspecified                |
| J18.9 | Pneumonia, unspecified                               |
|       |                                                      |

**Supplementary Table S2: ICD-10-CA diagnosis codes for comorbidities of interest**

| ICD-10-CA Codes | ICD-10-CA Codes Description                                     |
|-----------------|-----------------------------------------------------------------|
| <b>J45</b>      | Asthma                                                          |
| <b>J45.0</b>    | Predominantly allergic asthma                                   |
| <b>J45.00</b>   | Predominantly allergic asthma without stated status asthmaticus |
| <b>J45.01</b>   | Predominantly allergic asthma with stated status asthmaticus    |
| <b>J45.1</b>    | Nonallergic asthma                                              |
| <b>J45.10</b>   | Nonallergic asthma without stated status asthmaticus            |
| <b>J45.11</b>   | Nonallergic asthma with stated status asthmaticus               |
| <b>J45.8</b>    | Mixed asthma                                                    |
| <b>J45.80</b>   | Mixed asthma without stated status asthmaticus                  |
| <b>J45.81</b>   | Mixed asthma with stated status asthmaticus                     |
| <b>J45.9</b>    | Asthma, unspecified                                             |
| <b>J45.90</b>   | Asthma, unspecified, without stated status asthmaticus          |
| <b>J45.91</b>   | Asthma, unspecified, with stated status asthmaticus             |

**Chronic Respiratory Diseases (CRD)**

| ICD-10-CA Codes | ICD-10-CA Codes Description                      |
|-----------------|--------------------------------------------------|
| <b>J40</b>      | Bronchitis, not specified as acute or chronic    |
| <b>J41</b>      | Simple and mucopurulent chronic bronchitis       |
| <b>J41.0</b>    | Simple chronic bronchitis                        |
| <b>J41.1</b>    | Mucopurulent chronic bronchitis                  |
| <b>J41.8</b>    | Mixed simple and mucopurulent chronic bronchitis |
| <b>J42</b>      | Unspecified chronic bronchitis                   |
| <b>J43</b>      | Emphysema                                        |
| <b>J43.0</b>    | MacLeod's syndrome                               |
| <b>J43.1</b>    | Panlobular emphysema                             |
| <b>J43.2</b>    | Centrilobular emphysema                          |
| <b>J43.8</b>    | Other emphysema                                  |

|              |                                                                              |
|--------------|------------------------------------------------------------------------------|
| <b>J43.9</b> | Emphysema, unspecified                                                       |
| <b>J44</b>   | Other chronic obstructive pulmonary disease                                  |
| <b>J44.0</b> | Chronic obstructive pulmonary disease with acute lower respiratory infection |
| <b>J44.1</b> | Chronic obstructive pulmonary disease with acute exacerbation, unspecified   |
| <b>J44.8</b> | Other specified chronic obstructive pulmonary disease                        |
| <b>J44.9</b> | Chronic obstructive pulmonary disease, unspecified                           |
| <b>J47</b>   | Bronchiectasis                                                               |
| <b>J98</b>   | Other respiratory disorders                                                  |
| <b>J98.0</b> | Diseases of bronchus, not elsewhere classified                               |
| <b>J98.2</b> | Interstitial emphysema                                                       |
| <b>J98.3</b> | Compensatory emphysema                                                       |
| <b>J98.4</b> | Other disorders of lung                                                      |
| <b>J98.8</b> | Other specified respiratory disorders                                        |
| <b>J98.9</b> | Respiratory disorder, unspecified                                            |
| <b>E84</b>   | Cystic fibrosis                                                              |
| <b>E84.0</b> | Cystic fibrosis with pulmonary manifestations                                |
| <b>E84.1</b> | Cystic fibrosis with intestinal manifestations                               |
| <b>E84.8</b> | Cystic fibrosis with other manifestations                                    |
| <b>E84.9</b> | Cystic fibrosis, unspecified                                                 |

## Diabetes

| ICD-10-CA Codes | ICD-10-CA Codes Description                                     |
|-----------------|-----------------------------------------------------------------|
| <b>E11</b>      | Type 2 diabetes mellitus                                        |
| <b>E11.0</b>    | Type 2 diabetes mellitus with coma                              |
| <b>E11.1</b>    | Type 2 diabetes mellitus with acidosis                          |
| <b>E11.10</b>   | Type 2 diabetes mellitus with ketoacidosis                      |
| <b>E11.11</b>   | Type 2 diabetes mellitus with lactic acidosis                   |
| <b>E11.12</b>   | Type 2 diabetes mellitus with ketoacidosis with lactic acidosis |
| <b>E11.2</b>    | Type 2 diabetes mellitus with kidney complications              |
| <b>E11.20</b>   | Type 2 diabetes mellitus with incipient diabetic nephropathy    |

|               |                                                                                                |
|---------------|------------------------------------------------------------------------------------------------|
| <b>E11.23</b> | Type 2 diabetes mellitus with established or advanced kidney disease                           |
| <b>E11.28</b> | Type 2 diabetes mellitus with other specified kidney complication not elsewhere classified     |
| <b>E11.3</b>  | Type 2 diabetes mellitus with ophthalmic complications                                         |
| <b>E11.30</b> | Type 2 diabetes mellitus with background retinopathy                                           |
| <b>E11.31</b> | Type 2 diabetes mellitus with preproliferative retinopathy                                     |
| <b>E11.32</b> | Type 2 diabetes mellitus with proliferative retinopathy                                        |
| <b>E11.33</b> | Type 2 diabetes mellitus with other retinopathy                                                |
| <b>E11.36</b> | Type 2 diabetes mellitus with advanced ophthalmic disease                                      |
| <b>E11.38</b> | Type 2 diabetes mellitus with other specified ophthalmic complication not elsewhere classified |
| <b>E11.4</b>  | Type 2 diabetes mellitus with neurological complications                                       |
| <b>E11.40</b> | Type 2 diabetes mellitus with mononeuropathy                                                   |
| <b>E11.41</b> | Type 2 diabetes mellitus with polyneuropathy                                                   |
| <b>E11.42</b> | Type 2 diabetes mellitus with autonomic neuropathy                                             |
| <b>E11.5</b>  | Type 2 diabetes mellitus with circulatory complications                                        |
| <b>E11.50</b> | Type 2 diabetes mellitus with peripheral angiopathy                                            |
| <b>E11.51</b> | Type 2 diabetes mellitus with peripheral angiopathy with gangrene                              |
| <b>E11.52</b> | Type 2 diabetes mellitus with certain circulatory complications                                |
| <b>E11.6</b>  | Type 2 diabetes mellitus with other specified complications                                    |
| <b>E11.60</b> | Type 2 diabetes mellitus with musculoskeletal and connective tissue complication               |
| <b>E11.61</b> | Type 2 diabetes mellitus with skin and subcutaneous tissue complication                        |
| <b>E11.62</b> | Type 2 diabetes mellitus with periodontal complication                                         |
| <b>E11.63</b> | Type 2 diabetes mellitus with hypoglycaemia                                                    |
| <b>E11.64</b> | Type 2 diabetes mellitus with poor control, so described                                       |
| <b>E11.68</b> | Type 2 diabetes mellitus with other specified complication, not elsewhere classified           |
| <b>E11.7</b>  | Type 2 diabetes mellitus with multiple complications                                           |
| <b>E11.70</b> | Type 2 diabetes mellitus with foot ulcer (angiopathic)(neuropathic)                            |
| <b>E11.71</b> | Type 2 diabetes mellitus with foot ulcer (angiopathic) (neuropathic) with gangrene             |
| <b>E11.78</b> | Type 2 diabetes mellitus with multiple other complications                                     |
| <b>E11.9</b>  | Type 2 diabetes mellitus without (mention of) complications                                    |

## Cardiovascular Disease (CVD)

| ICD-10-CA Codes | ICD-10-CA Codes Description                               |
|-----------------|-----------------------------------------------------------|
|                 |                                                           |
| <b>I05</b>      | Rheumatic mitral valve diseases                           |
| <b>I05.0</b>    | Mitral stenosis                                           |
| <b>I05.1</b>    | Rheumatic mitral insufficiency                            |
| <b>I05.2</b>    | Mitral stenosis with insufficiency                        |
| <b>I05.8</b>    | Other mitral valve diseases                               |
| <b>I05.9</b>    | Mitral valve disease, unspecified                         |
|                 |                                                           |
| <b>I06</b>      | Rheumatic aortic valve diseases                           |
| <b>I06.0</b>    | Rheumatic aortic stenosis                                 |
| <b>I06.1</b>    | Rheumatic aortic insufficiency                            |
| <b>I06.2</b>    | Rheumatic aortic stenosis with insufficiency              |
| <b>I06.8</b>    | Other rheumatic aortic valve diseases                     |
| <b>I06.9</b>    | Rheumatic aortic valve disease, unspecified               |
|                 |                                                           |
| <b>I07</b>      | Rheumatic tricuspid valve diseases                        |
| <b>I07.0</b>    | Tricuspid stenosis                                        |
| <b>I07.1</b>    | Tricuspid insufficiency                                   |
| <b>I07.2</b>    | Tricuspid stenosis with insufficiency                     |
| <b>I07.8</b>    | Other tricuspid valve diseases                            |
| <b>I07.9</b>    | Tricuspid valve disease, unspecified                      |
|                 |                                                           |
| <b>I08</b>      | Multiple valve diseases                                   |
| <b>I08.0</b>    | Disorders of both mitral and aortic valves                |
| <b>I08.1</b>    | Disorders of both mitral and tricuspid valves             |
| <b>I08.2</b>    | Disorders of both aortic and tricuspid valves             |
| <b>I08.3</b>    | Combined disorders of mitral, aortic and tricuspid valves |
| <b>I08.8</b>    | Other multiple valve diseases                             |
| <b>I08.9</b>    | Multiple valve disease, unspecified                       |
|                 |                                                           |
| <b>I09</b>      | Other rheumatic heart diseases                            |
| <b>I09.0</b>    | Rheumatic myocarditis                                     |
| <b>I09.1</b>    | Rheumatic diseases of endocardium, valve unspecified      |

|               |                                                                        |
|---------------|------------------------------------------------------------------------|
| <b>I09.2</b>  | Chronic rheumatic pericarditis                                         |
| <b>I09.8</b>  | Other specified rheumatic heart diseases                               |
| <b>I09.9</b>  | Rheumatic heart disease, unspecified                                   |
|               |                                                                        |
| <b>I11</b>    | Hypertensive heart disease                                             |
|               |                                                                        |
| <b>I13</b>    | Hypertensive heart and renal disease                                   |
|               |                                                                        |
| <b>I20</b>    | Angina pectoris                                                        |
| <b>I20.0</b>  | Unstable angina                                                        |
| <b>I20.1</b>  | Angina pectoris with documented spasm                                  |
| <b>I20.8</b>  | Other forms of angina pectoris                                         |
| <b>I20.80</b> | Atypical angina                                                        |
| <b>I20.88</b> | Other forms of angina pectoris                                         |
| <b>I20.9</b>  | Angina pectoris, unspecified                                           |
|               |                                                                        |
| <b>I21</b>    | Acute myocardial infarction                                            |
| <b>I21.0</b>  | Acute transmural myocardial infarction of anterior wall                |
| <b>I21.1</b>  | Acute transmural myocardial infarction of inferior wall                |
| <b>I21.2</b>  | Acute transmural myocardial infarction of other sites                  |
| <b>I21.3</b>  | Acute transmural myocardial infarction of unspecified site             |
| <b>I21.4</b>  | Acute subendocardial myocardial infarction                             |
| <b>I21.9</b>  | Acute myocardial infarction, unspecified                               |
|               |                                                                        |
| <b>I24</b>    | Other acute ischaemic heart diseases                                   |
| <b>I24.0</b>  | Coronary thrombosis not resulting in myocardial infarction             |
| <b>I24.1</b>  | Dressler's syndrome                                                    |
| <b>I24.8</b>  | Other forms of acute ischaemic heart disease                           |
| <b>I24.9</b>  | Acute ischaemic heart disease, unspecified                             |
|               |                                                                        |
| <b>I25</b>    | Chronic ischaemic heart disease                                        |
| <b>I25.0</b>  | Atherosclerotic cardiovascular disease, so described                   |
| <b>I25.1</b>  | Atherosclerotic heart disease                                          |
| <b>I25.10</b> | Atherosclerotic heart disease of native coronary artery                |
| <b>I25.11</b> | Atherosclerotic heart disease of autologous vein bypass graft          |
| <b>I25.12</b> | Atherosclerotic heart disease of nonautologous biological bypass graft |

|               |                                                                              |
|---------------|------------------------------------------------------------------------------|
| <b>I25.13</b> | Atherosclerotic heart disease of artery bypass graft                         |
| <b>I25.14</b> | Atherosclerotic heart disease of unspecified type of bypass graft            |
| <b>I25.15</b> | Atherosclerotic heart disease of coronary artery of transplanted heart       |
| <b>I25.19</b> | Atherosclerotic heart disease of unspecified type of vessel, native or graft |
| <b>I25.2</b>  | Old myocardial infarction                                                    |
| <b>I25.3</b>  | Aneurysm of heart                                                            |
| <b>I25.4</b>  | Coronary artery aneurysm and dissection                                      |
| <b>I25.5</b>  | Ischaemic cardiomyopathy                                                     |
| <b>I25.6</b>  | Silent myocardial ischaemia                                                  |
| <b>I25.8</b>  | Other forms of chronic ischaemic heart disease                               |
| <b>I25.9</b>  | Chronic ischaemic heart disease, unspecified                                 |
|               |                                                                              |
| <b>I27</b>    | Other pulmonary heart diseases                                               |
| <b>I27.0</b>  | Primary pulmonary hypertension                                               |
| <b>I27.1</b>  | Kyphoscoliotic heart disease                                                 |
| <b>I27.2</b>  | Other secondary pulmonary hypertension                                       |
| <b>I27.8</b>  | Other specified pulmonary heart diseases                                     |
| <b>I27.9</b>  | Pulmonary heart disease, unspecified                                         |
|               |                                                                              |
| <b>I42</b>    | Cardiomyopathy                                                               |
| <b>I42.0</b>  | Dilated cardiomyopathy                                                       |
| <b>I42.1</b>  | Obstructive hypertrophic cardiomyopathy                                      |
| <b>I42.2</b>  | Other hypertrophic cardiomyopathy                                            |
| <b>I42.3</b>  | Endomyocardial (eosinophilic) disease                                        |
| <b>I42.4</b>  | Endocardial fibroelastosis                                                   |
| <b>I42.5</b>  | Other restrictive cardiomyopathy                                             |
| <b>I42.6</b>  | Alcoholic cardiomyopathy                                                     |
| <b>I42.7</b>  | Cardiomyopathy due to drugs and other external agents                        |
| <b>I42.8</b>  | Other cardiomyopathies                                                       |
| <b>I42.9</b>  | Cardiomyopathy, unspecified                                                  |
|               |                                                                              |
| <b>I43</b>    | Cardiomyopathy in diseases classified elsewhere                              |
| <b>I43.0</b>  | Cardiomyopathy in infectious and parasitic diseases classified elsewhere     |
| <b>I43.1</b>  | Cardiomyopathy in metabolic diseases                                         |
| <b>I43.2</b>  | Cardiomyopathy in nutritional diseases                                       |
| <b>I43.8</b>  | Cardiomyopathy in other diseases classified elsewhere                        |



|               |                                                 |
|---------------|-------------------------------------------------|
|               |                                                 |
| <b>I44</b>    | Atrioventricular and left bundle-branch block   |
| <b>I44.0</b>  | Atrioventricular block, first degree            |
| <b>I44.1</b>  | Atrioventricular block, second degree           |
| <b>I44.2</b>  | Atrioventricular block, complete                |
| <b>I44.3</b>  | Other and unspecified atrioventricular block    |
| <b>I44.4</b>  | Left anterior fascicular block                  |
| <b>I44.5</b>  | Left posterior fascicular block                 |
| <b>I44.6</b>  | Other and unspecified fascicular block          |
| <b>I44.7</b>  | Left bundle-branch block, unspecified           |
|               |                                                 |
| <b>I45</b>    | Other conduction disorders                      |
| <b>I45.0</b>  | Right fascicular block                          |
| <b>I45.1</b>  | Other and unspecified right bundle-branch block |
| <b>I45.2</b>  | Bifascicular block                              |
| <b>I45.3</b>  | Trifascicular block                             |
| <b>I45.4</b>  | Nonspecific intraventricular block              |
| <b>I45.5</b>  | Other specified heart block                     |
| <b>I45.6</b>  | Pre-excitation syndrome                         |
| <b>I45.8</b>  | Other specified conduction disorders            |
| <b>I45.9</b>  | Conduction disorder, unspecified                |
|               |                                                 |
| <b>I46</b>    | Cardiac arrest                                  |
| <b>I46.0</b>  | Cardiac arrest with successful resuscitation    |
| <b>I46.1</b>  | Sudden cardiac death, so described              |
| <b>I46.9</b>  | Cardiac arrest, unspecified                     |
|               |                                                 |
| <b>I47</b>    | Paroxysmal tachycardia                          |
| <b>I47.0</b>  | Re-entry ventricular arrhythmia                 |
| <b>I47.1</b>  | Supraventricular tachycardia                    |
| <b>I47.2</b>  | Ventricular tachycardia                         |
| <b>I47.9</b>  | Paroxysmal tachycardia, unspecified             |
|               |                                                 |
| <b>I48</b>    | Atrial fibrillation and flutter                 |
| <b>I48.0</b>  | Atrial fibrillation                             |
| <b>I48.00</b> | Paroxysmal atrial fibrillation                  |

|               |                                                             |
|---------------|-------------------------------------------------------------|
| <b>I48.01</b> | Persistent atrial fibrillation                              |
| <b>I48.02</b> | Chronic atrial fibrillation                                 |
| <b>I48.1</b>  | <b>Atrial flutter</b>                                       |
| <b>I48.3</b>  | Typical atrial flutter                                      |
| <b>I48.4</b>  | Atypical atrial flutter                                     |
| <b>I48.9</b>  | Atrial fibrillation and atrial flutter, unspecified         |
| <b>I48.90</b> | Atrial fibrillation, unspecified                            |
| <b>I48.91</b> | Atrial flutter, unspecified                                 |
|               |                                                             |
| <b>I49</b>    | Other cardiac arrhythmias                                   |
| <b>I49.0</b>  | Ventricular fibrillation and flutter                        |
| <b>I49.00</b> | Ventricular fibrillation                                    |
| <b>I49.01</b> | Ventricular flutter                                         |
| <b>I49.1</b>  | Atrial premature depolarization                             |
| <b>I49.2</b>  | Junctional premature depolarization                         |
| <b>I49.3</b>  | Ventricular premature depolarization                        |
| <b>I49.4</b>  | Other and unspecified premature depolarization              |
| <b>I49.5</b>  | Sick sinus syndrome                                         |
| <b>I49.8</b>  | Other specified cardiac arrhythmias                         |
| <b>I49.9</b>  | Cardiac arrhythmia, unspecified                             |
|               |                                                             |
| <b>I50</b>    | Heart failure                                               |
| <b>I50.0</b>  | Congestive heart failure                                    |
| <b>I50.1</b>  | Left ventricular failure                                    |
| <b>I50.9</b>  | Heart failure, unspecified                                  |
|               |                                                             |
| <b>I51</b>    | Complications and ill-defined descriptions of heart disease |
| <b>I51.0</b>  | Cardiac septal defect, acquired                             |
| <b>I51.1</b>  | Rupture of chordae tendineae, not elsewhere classified      |
| <b>I51.2</b>  | Rupture of papillary muscle, not elsewhere classified       |
| <b>I51.3</b>  | Intracardiac thrombosis, not elsewhere classified           |
| <b>I51.4</b>  | Myocarditis, unspecified                                    |
| <b>I51.5</b>  | Myocardial degeneration                                     |
| <b>I51.6</b>  | Cardiovascular disease, unspecified                         |
| <b>I51.7</b>  | Cardiomegaly                                                |
| <b>I51.8</b>  | Other ill-defined heart diseases                            |

|               |                                                                                       |
|---------------|---------------------------------------------------------------------------------------|
| <b>I51.9</b>  | Heart disease, unspecified                                                            |
|               |                                                                                       |
| <b>I52</b>    | Other heart disorders in diseases classified elsewhere                                |
| <b>I52.0</b>  | Other heart disorders in bacterial diseases classified elsewhere                      |
| <b>I52.1</b>  | Other heart disorders in other infectious and parasitic diseases classified elsewhere |
| <b>I52.8</b>  | Other heart disorders in other diseases classified elsewhere                          |
|               |                                                                                       |
| <b>I63</b>    | Cerebral infarction                                                                   |
| <b>I63.0</b>  | Cerebral infarction due to thrombosis of precerebral arteries                         |
| <b>I63.1</b>  | Cerebral infarction due to embolism of precerebral arteries                           |
| <b>I63.2</b>  | Cerebral infarction due to unspecified occlusion or stenosis of precerebral arteries  |
| <b>I63.3</b>  | Cerebral infarction due to thrombosis of cerebral arteries                            |
| <b>I63.4</b>  | Cerebral infarction due to embolism of cerebral arteries                              |
| <b>I63.5</b>  | Cerebral infarction due to unspecified occlusion or stenosis of cerebral arteries     |
| <b>I63.6</b>  | Cerebral infarction due to cerebral venous thrombosis, nonpyogenic                    |
| <b>I63.8</b>  | Other cerebral infarction                                                             |
| <b>I63.9</b>  | Cerebral infarction, unspecified                                                      |
|               |                                                                                       |
| <b>J96</b>    | Respiratory failure, not elsewhere classified                                         |
| <b>J96.0</b>  | Acute respiratory failure J96.00 J96.01 J96.09                                        |
| <b>J96.00</b> | Acute respiratory failure, type 1 [hypoxic]                                           |
| <b>J96.01</b> | Acute respiratory failure, type II [hypercapnic]                                      |
| <b>J96.09</b> | Acute respiratory failure, type unspecified                                           |
| <b>J96.1</b>  | Chronic respiratory failure J96.10 J96.11 J96.19                                      |
| <b>J96.10</b> | Chronic respiratory failure, type I [hypoxic]                                         |
| <b>J96.11</b> | Chronic respiratory failure, type II [hypercapnic]                                    |
| <b>J96.19</b> | Chronic respiratory failure, type unspecified                                         |
| <b>J96.9</b>  | Respiratory failure, unspecified J96.90 J96.91 J96.99                                 |
| <b>J96.90</b> | Respiratory failure, unspecified, type I [hypoxic]                                    |
| <b>J96.91</b> | Respiratory failure, unspecified, type II [hypercapnic]                               |
| <b>J96.99</b> | Respiratory failure, unspecified, type unspecified                                    |
|               |                                                                                       |
| <b>R09.2</b>  | Respiratory arrest                                                                    |

## Obesity

| ICD-10-CA Codes       | ICD-10-CA Codes Description                   |
|-----------------------|-----------------------------------------------|
| <b>Morbid Obesity</b> |                                               |
| <b>E66.2</b>          | Extreme obesity with alveolar hypoventilation |
| <b>Other Obesity</b>  |                                               |
| <b>E66</b>            | Obesity                                       |
| <b>E66.0</b>          | Obesity due to excess calories                |
| <b>E66.1</b>          | Drug-induced obesity                          |
| <b>E66.8</b>          | Other obesity                                 |
| <b>E66.9</b>          | Obesity, unspecified                          |

**Supplementary Table S3.** Incidence rates and in-hospital mortality of acute-care hospitalization for all-cause community acquired pneumonia, by age group, fiscal year 2009-2018, Canada (excluding Quebec).

| Fiscal Year | Age group | Incidence       |                              |                                     | Fatality         |                                                          |
|-------------|-----------|-----------------|------------------------------|-------------------------------------|------------------|----------------------------------------------------------|
|             |           | Number of cases | Number in at-risk population | Incidence rate per 100,000 (95% CI) | Number of deaths | In-hospital mortality rate - deaths / 100 cases (95% CI) |
| 2009/2010   | 50-64     | 14,070          | 5,035,077                    | 279.44 (274.82, 284.06)             | 1,031            | 7.33 (6.88, 7.77)                                        |
|             | 65-74     | 14,628          | 1,854,677                    | 788.71 (775.93, 801.49)             | 1,625            | 11.11 (10.57, 11.65)                                     |
|             | 75-84     | 21,936          | 1,183,932                    | 1852.81 (1828.29, 1877.33)          | 3,377            | 15.39 (14.88, 15.91)                                     |
|             | ≥85       | 18,124          | 460,669                      | 3934.28 (3877.00, 3991.56)          | 3,919            | 21.62 (20.95, 22.30)                                     |
|             | ≥65       | 54,688          | 3,499,278                    | 1562.84 (1549.74, 1575.94)          | 8,921            | 16.31 (15.97, 16.65)                                     |
| 2010/2011   | 50-64     | 14,054          | 5,204,909                    | 270.01 (265.55, 274.48)             | 1,078            | 7.67 (7.21, 8.13)                                        |
|             | 65-74     | 15,813          | 1,914,183                    | 826.10 (813.22, 838.97)             | 1,668            | 10.55 (10.04, 11.05)                                     |
|             | 75-84     | 24,159          | 1,197,309                    | 2017.77 (1992.33, 2043.22)          | 3,532            | 14.62 (14.14, 15.10)                                     |
|             | ≥85       | 20,717          | 479,970                      | 4316.31 (4257.53, 4375.09)          | 4,247            | 20.50 (19.88, 21.12)                                     |
|             | ≥65       | 60,689          | 3,591,462                    | 1689.81 (1676.37, 1703.26)          | 9,447            | 15.57 (15.25, 15.88)                                     |
| 2011/2012   | 50-64     | 14,265          | 5,360,900                    | 266.09 (261.73, 270.46)             | 949              | 6.65 (6.23, 7.08)                                        |
|             | 65-74     | 16,012          | 1,989,308                    | 804.90 (792.44, 817.37)             | 1,721            | 10.75 (10.24, 11.26)                                     |
|             | 75-84     | 24,133          | 1,212,989                    | 1989.55 (1964.45, 2014.65)          | 3,402            | 14.10 (13.62, 14.57)                                     |
|             | ≥85       | 21,449          | 496,713                      | 4318.19 (4260.40, 4375.98)          | 4,144            | 19.32 (18.73, 19.91)                                     |
|             | ≥65       | 61,594          | 3,699,010                    | 1665.15 (1652.00, 1678.30)          | 9,267            | 15.05 (14.74, 15.35)                                     |
| 2012/2013   | 50-64     | 15,302          | 5,470,256                    | 279.73 (275.30, 284.16)             | 1,032            | 6.74 (6.33, 7.16)                                        |
|             | 65-74     | 17,521          | 2,108,815                    | 830.85 (818.54, 843.15)             | 1,742            | 9.94 (9.48, 10.41)                                       |
|             | 75-84     | 25,100          | 1,229,256                    | 2041.89 (2016.62, 2067.15)          | 3,403            | 13.56 (13.10, 14.01)                                     |
|             | ≥85       | 23,733          | 515,329                      | 4605.41 (4546.81, 4664.00)          | 4,541            | 19.13 (18.58, 19.69)                                     |
|             | ≥65       | 66,354          | 3,853,400                    | 1721.96 (1708.86, 1735.06)          | 9,686            | 14.60 (14.31, 14.89)                                     |
| 2013/2014   | 50-64     | 15,825          | 5,595,562                    | 282.81 (278.41, 287.22)             | 1,043            | 6.59 (6.19, 6.99)                                        |
|             | 65-74     | 17,460          | 2,227,126                    | 783.97 (772.34, 795.60)             | 1,769            | 10.13 (9.66, 10.60)                                      |
|             | 75-84     | 23,966          | 1,248,902                    | 1918.97 (1894.67, 1943.26)          | 3,130            | 13.06 (12.60, 13.52)                                     |
|             | ≥85       | 22,586          | 532,643                      | 4240.36 (4185.06, 4295.67)          | 4,122            | 18.25 (17.69, 18.81)                                     |
|             | ≥65       | 64,012          | 4,008,671                    | 1596.84 (1584.47, 1609.21)          | 9,021            | 14.09 (13.80, 14.38)                                     |
| 2014/2015   | 50-64     | 15,629          | 5,717,910                    | 273.33 (269.05, 277.62)             | 1,023            | 6.55 (6.14, 6.95)                                        |
|             | 65-74     | 19,108          | 2,332,704                    | 819.14 (807.52, 830.75)             | 1,873            | 9.80 (9.36, 10.25)                                       |
|             | 75-84     | 27,014          | 1,271,749                    | 2124.16 (2098.83, 2149.49)          | 3,292            | 12.19 (11.77, 12.60)                                     |
|             | ≥85       | 26,761          | 548,810                      | 4876.19 (4817.76, 4934.61)          | 4,686            | 17.51 (17.01, 18.01)                                     |
|             | ≥65       | 72,883          | 4,153,263                    | 1754.84 (1742.10, 1767.58)          | 9,851            | 13.52 (13.25, 13.78)                                     |
| 2015/2016   | 50-64     | 18,641          | 5,813,904                    | 320.63 (316.03, 325.23)             | 1,505            | 8.07 (7.67, 8.48)                                        |
|             | 65-74     | 20,772          | 2,437,632                    | 852.14 (840.55, 863.73)             | 2,337            | 11.25 (10.79, 11.71)                                     |
|             | 75-84     | 26,852          | 1,291,805                    | 2078.64 (2053.78, 2103.50)          | 3,701            | 13.78 (13.34, 14.23)                                     |
|             | ≥85       | 25,674          | 563,271                      | 4558.02 (4502.26, 4613.77)          | 4,641            | 18.08 (17.56, 18.60)                                     |
|             | ≥65       | 73,298          | 4,292,708                    | 1707.50 (1695.14, 1719.86)          | 10,679           | 14.57 (14.29, 14.85)                                     |
| 2016/2017   | 50-64     | 18,132          | 5,878,677                    | 308.44 (303.95, 312.93)             | 1,499            | 8.27 (7.85, 8.69)                                        |
|             | 65-74     | 21,825          | 2,540,142                    | 859.20 (847.80, 870.60)             | 2,413            | 11.06 (10.61, 11.50)                                     |
|             | 75-84     | 28,171          | 1,320,512                    | 2133.34 (2108.43, 2158.25)          | 3,934            | 13.96 (13.53, 14.40)                                     |
|             | ≥85       | 28,037          | 583,374                      | 4806.01 (4749.75, 4862.26)          | 5,140            | 18.33 (17.83, 18.83)                                     |

|           |       |        |           |                            |        |                      |
|-----------|-------|--------|-----------|----------------------------|--------|----------------------|
|           | ≥65   | 78,033 | 4,444,028 | 1755.91 (1743.59, 1768.23) | 11,487 | 14.72 (14.45, 14.99) |
| 2017/2018 | 50-64 | 19,132 | 5,915,193 | 323.44 (318.86, 328.02)    | 1,479  | 7.73 (7.34, 8.12)    |
|           | 65-74 | 23,099 | 2,647,753 | 872.40 (861.15, 883.65)    | 2,505  | 10.84 (10.42, 11.27) |
|           | 75-84 | 28,897 | 1,359,020 | 2126.31 (2101.80, 2150.83) | 3,892  | 13.47 (13.05, 13.89) |
|           | ≥85   | 29,083 | 600,326   | 4844.53 (4788.86, 4900.21) | 5,253  | 18.06 (17.57, 18.55) |
|           | ≥65   | 81,079 | 4,607,099 | 1759.87 (1747.76, 1771.98) | 11,650 | 14.37 (14.11, 14.63) |
| 2018/2019 | 50-64 | 19,355 | 5,936,682 | 326.02 (321.43, 330.62)    | 1,577  | 8.15 (7.75, 8.55)    |
|           | 65-74 | 22,755 | 2,752,092 | 826.83 (816.08, 837.57)    | 2,421  | 10.64 (10.22, 11.06) |
|           | 75-84 | 27,266 | 1,408,175 | 1936.27 (1913.28, 1959.25) | 3,833  | 14.06 (13.61, 14.50) |
|           | ≥85   | 26,711 | 615,858   | 4337.20 (4285.19, 4389.22) | 4,760  | 17.82 (17.31, 18.33) |
|           | ≥65   | 76,732 | 4,776,125 | 1606.57 (1595.21, 1617.94) | 11,014 | 14.35 (14.09, 14.62) |

**Supplementary Table S4.** Incidence rates of acute-care hospitalization and in-hospital mortality for all-cause community acquired pneumonia, by case coding and age group, fiscal year 2009-2018, Canada (excluding Quebec).

| Fiscal Year | Case coding | Age group | Number of cases | Number in at-risk population | Incidence rate per 100,000 | Incidence rate per 100,000 (95% CI) | Number of deaths | In-hospital mortality rate (deaths / 100 cases) | In-hospital mortality rate 95% CI |
|-------------|-------------|-----------|-----------------|------------------------------|----------------------------|-------------------------------------|------------------|-------------------------------------------------|-----------------------------------|
| 2009/10     | MRDx        | 50-64     | 6,611           | 5,035,077                    | 131.30                     | (128.13, 134.46)                    | 278              | 4.21                                            | (3.71, 4.70)                      |
|             |             | 65-74     | 5,581           | 1,854,677                    | 300.91                     | (293.02, 308.81)                    | 419              | 7.51                                            | (6.79, 8.23)                      |
|             |             | 75-84     | 8,732           | 1,183,932                    | 737.54                     | (722.07, 753.01)                    | 1,020            | 11.68                                           | (10.96, 12.40)                    |
|             |             | ≥85       | 8,375           | 460,669                      | 1818.01                    | (1779.07, 1856.94)                  | 1,605            | 19.16                                           | (18.23, 20.10)                    |
|             |             | ≥65       | 22,688          | 3,499,278                    | 648.36                     | (639.93, 656.80)                    | 3,044            | 13.42                                           | (12.94, 13.89)                    |
|             | ODx         | 50-64     | 7,459           | 5,035,077                    | 148.14                     | (144.78, 151.50)                    | 753              | 10.10                                           | (9.37, 10.82)                     |
|             |             | 65-74     | 9,047           | 1,854,677                    | 487.79                     | (477.74, 497.85)                    | 1,206            | 13.33                                           | (12.58, 14.08)                    |
|             |             | 75-84     | 13,204          | 1,183,932                    | 1115.27                    | (1096.24, 1134.29)                  | 2,357            | 17.85                                           | (17.13, 18.57)                    |
|             |             | ≥85       | 9,749           | 460,669                      | 2116.27                    | (2074.26, 2158.28)                  | 2,314            | 23.74                                           | (22.77, 24.70)                    |
|             |             | ≥65       | 32,000          | 3,499,278                    | 914.47                     | (904.45, 924.49)                    | 5,877            | 18.37                                           | (17.90, 18.84)                    |
| 2010/11     | MRDx        | 50-64     | 6,248           | 5,204,909                    | 120.04                     | (117.06, 123.02)                    | 293              | 4.69                                            | (4.15, 5.23)                      |
|             |             | 65-74     | 5,901           | 1,914,183                    | 308.28                     | (300.41, 316.14)                    | 421              | 7.13                                            | (6.45, 7.82)                      |
|             |             | 75-84     | 9,381           | 1,197,309                    | 783.51                     | (767.65, 799.36)                    | 1,029            | 10.97                                           | (10.30, 11.64)                    |
|             |             | ≥85       | 9,383           | 479,970                      | 1954.91                    | (1915.36, 1994.47)                  | 1,733            | 18.47                                           | (17.60, 19.34)                    |
|             |             | ≥65       | 24,665          | 3,591,462                    | 686.77                     | (678.20, 695.34)                    | 3,183            | 12.90                                           | (12.46, 13.35)                    |
|             | ODx         | 50-64     | 7,806           | 5,204,909                    | 149.97                     | (146.65, 153.30)                    | 785              | 10.06                                           | (9.35, 10.76)                     |
|             |             | 65-74     | 9,912           | 1,914,183                    | 517.82                     | (507.62, 528.01)                    | 1,247            | 12.58                                           | (11.88, 13.28)                    |
|             |             | 75-84     | 14,778          | 1,197,309                    | 1234.27                    | (1214.37, 1254.17)                  | 2,503            | 16.94                                           | (16.27, 17.60)                    |
|             |             | ≥85       | 11,334          | 479,970                      | 2361.40                    | (2317.92, 2404.87)                  | 2,514            | 22.18                                           | (21.31, 23.05)                    |
|             |             | ≥65       | 36,024          | 3,591,462                    | 1003.05                    | (992.69, 1013.40)                   | 6,264            | 17.39                                           | (16.96, 17.82)                    |
| 2011/12     | MRDx        | 50-64     | 6,561           | 5,360,900                    | 122.39                     | (119.42, 125.35)                    | 255              | 3.89                                            | (3.41, 4.36)                      |
|             |             | 65-74     | 6,134           | 1,989,308                    | 308.35                     | (300.63, 316.07)                    | 420              | 6.85                                            | (6.19, 7.50)                      |
|             |             | 75-84     | 9,264           | 1,212,989                    | 763.73                     | (748.18, 779.29)                    | 948              | 10.23                                           | (9.58, 10.88)                     |
|             |             | ≥85       | 9,769           | 496,713                      | 1966.73                    | (1927.73, 2005.73)                  | 1,647            | 16.86                                           | (16.05, 17.67)                    |
|             |             | ≥65       | 25,167          | 3,699,010                    | 680.37                     | (671.97, 688.78)                    | 3,015            | 11.98                                           | (11.55, 12.41)                    |
|             | ODx         | 50-64     | 7,704           | 5,360,900                    | 143.71                     | (140.50, 146.92)                    | 694              | 9.01                                            | (8.34, 9.68)                      |
|             |             | 65-74     | 9,878           | 1,989,308                    | 496.55                     | (486.76, 506.35)                    | 1,301            | 13.17                                           | (12.45, 13.89)                    |
|             |             | 75-84     | 14,869          | 1,212,989                    | 1225.81                    | (1206.11, 1245.52)                  | 2,454            | 16.50                                           | (15.85, 17.16)                    |
|             |             | ≥85       | 11,680          | 496,713                      | 2351.46                    | (2308.81, 2394.10)                  | 2,497            | 21.38                                           | (20.54, 22.22)                    |
|             |             | ≥65       | 36,427          | 3,699,010                    | 984.78                     | (974.66, 994.89)                    | 6,252            | 17.16                                           | (16.74, 17.59)                    |
| 2012/13     | MRDx        | 50-64     | 7,012           | 5,470,256                    | 128.18                     | (125.18, 131.18)                    | 311              | 4.44                                            | (3.94, 4.93)                      |
|             |             | 65-74     | 6,677           | 2,108,815                    | 316.62                     | (309.03, 324.22)                    | 423              | 6.34                                            | (5.73, 6.94)                      |
|             |             | 75-84     | 9,930           | 1,229,256                    | 807.81                     | (791.92, 823.69)                    | 973              | 9.80                                            | (9.18, 10.41)                     |
|             |             | ≥85       | 11,025          | 515,329                      | 2139.41                    | (2099.47, 2179.35)                  | 1,770            | 16.05                                           | (15.31, 16.80)                    |
|             |             | ≥65       | 27,632          | 3,853,400                    | 717.08                     | (708.63, 725.54)                    | 3,166            | 11.46                                           | (11.06, 11.86)                    |
|             | ODx         | 50-64     | 8,290           | 5,470,256                    | 151.55                     | (148.28, 154.81)                    | 721              | 8.70                                            | (8.06, 9.33)                      |
|             |             | 65-74     | 10,844          | 2,108,815                    | 514.22                     | (504.54, 523.90)                    | 1,319            | 12.16                                           | (11.51, 12.82)                    |
|             |             | 75-84     | 15,170          | 1,229,256                    | 1234.08                    | (1214.44, 1253.72)                  | 2,430            | 16.02                                           | (15.38, 16.66)                    |
|             |             | ≥85       | 12,708          | 515,329                      | 2466.00                    | (2423.12, 2508.87)                  | 2,771            | 21.81                                           | (20.99, 22.62)                    |
|             |             | ≥65       | 38,722          | 3,853,400                    | 1004.88                    | (994.87, 1014.89)                   | 6,520            | 16.84                                           | (16.43, 17.25)                    |
| 2013/14     | MRDx        | 50-64     | 7,160           | 5,595,562                    | 127.96                     | (124.99, 130.92)                    | 292              | 4.08                                            | (3.61, 4.55)                      |
|             |             | 65-74     | 6,541           | 2,227,126                    | 293.70                     | (286.58, 300.81)                    | 415              | 6.34                                            | (5.73, 6.96)                      |
|             |             | 75-84     | 9,178           | 1,248,902                    | 734.89                     | (719.85, 749.92)                    | 909              | 9.90                                            | (9.26, 10.55)                     |
|             |             | ≥85       | 10,302          | 532,643                      | 1934.13                    | (1896.78, 1971.48)                  | 1,627            | 15.79                                           | (15.03, 16.56)                    |
|             |             | ≥65       | 26,021          | 4,008,671                    | 649.12                     | (641.23, 657.00)                    | 2,951            | 11.34                                           | (10.93, 11.75)                    |
|             | ODx         | 50-64     | 8,665           | 5,595,562                    | 154.85                     | (151.59, 158.12)                    | 751              | 8.67                                            | (8.05, 9.29)                      |

|         |      |       |        |           |         |                    |       |       |                |
|---------|------|-------|--------|-----------|---------|--------------------|-------|-------|----------------|
|         |      | 65-74 | 10,919 | 2,227,126 | 490.27  | (481.08, 499.47)   | 1,354 | 12.40 | (11.74, 13.06) |
|         |      | 75-84 | 14,788 | 1,248,902 | 1184.08 | (1165.00, 1203.16) | 2,221 | 15.02 | (14.39, 15.64) |
|         |      | ≥85   | 12,284 | 532,643   | 2306.24 | (2265.45, 2347.02) | 2,495 | 20.31 | (19.51, 21.11) |
|         |      | ≥65   | 37,991 | 4,008,671 | 947.72  | (938.19, 957.25)   | 6,070 | 15.98 | (15.58, 16.38) |
| 2014/15 | MRDx | 50-64 | 7,000  | 5,717,910 | 122.42  | (119.55, 125.29)   | 294   | 4.20  | (3.72, 4.68)   |
|         |      | 65-74 | 7,299  | 2,332,704 | 312.90  | (305.72, 320.08)   | 446   | 6.11  | (5.54, 6.68)   |
|         |      | 75-84 | 10,675 | 1,271,749 | 839.40  | (823.47, 855.32)   | 934   | 8.75  | (8.19, 9.31)   |
|         |      | ≥85   | 12,696 | 548,810   | 2313.37 | (2273.13, 2353.61) | 1,845 | 14.53 | (13.87, 15.20) |
|         |      | ≥65   | 30,670 | 4,153,263 | 738.46  | (730.19, 746.72)   | 3,225 | 10.52 | (10.15, 10.88) |
|         | ODx  | 50-64 | 86,29  | 5,717,910 | 150.91  | (147.73, 154.10)   | 729   | 8.45  | (7.83, 9.06)   |
|         |      | 65-74 | 11,809 | 2,332,704 | 506.24  | (497.11, 515.37)   | 1,427 | 12.08 | (11.46, 12.71) |
|         |      | 75-84 | 16,339 | 1,271,749 | 1284.77 | (1265.07, 1304.47) | 2,358 | 14.43 | (13.85, 15.01) |
|         |      | ≥85   | 14,065 | 548,810   | 2562.82 | (2520.46, 2605.17) | 2,841 | 20.20 | (19.46, 20.94) |
|         |      | ≥65   | 42,213 | 4,153,263 | 1016.38 | (1006.69, 1026.08) | 6,626 | 15.70 | (15.32, 16.07) |
| 2015/16 | MRDx | 50-64 | 7,894  | 5,813,904 | 135.78  | (132.78, 138.77)   | 309   | 3.91  | (3.48, 4.35)   |
|         |      | 65-74 | 7,501  | 2,437,632 | 307.72  | (300.75, 314.68)   | 491   | 6.55  | (5.97, 7.12)   |
|         |      | 75-84 | 10,183 | 1,291,805 | 788.28  | (772.97, 803.59)   | 953   | 9.36  | (8.76, 9.95)   |
|         |      | ≥85   | 11,380 | 563,271   | 2020.34 | (1983.22, 2057.46) | 1,680 | 14.76 | (14.06, 15.47) |
|         |      | ≥65   | 29,064 | 4,292,708 | 677.06  | (669.27, 684.84)   | 3,124 | 10.75 | (10.37, 11.13) |
|         | ODx  | 50-64 | 10,747 | 5,813,904 | 184.85  | (181.36, 188.34)   | 1,196 | 11.13 | (10.50, 11.76) |
|         |      | 65-74 | 13,271 | 2,437,632 | 544.42  | (535.16, 553.68)   | 1,846 | 13.91 | (13.28, 14.54) |
|         |      | 75-84 | 16,669 | 1,291,805 | 1290.37 | (1270.78, 1309.95) | 2,748 | 16.49 | (15.87, 17.10) |
|         |      | ≥85   | 14,294 | 563,271   | 2537.68 | (2496.08, 2579.28) | 2,961 | 20.71 | (19.97, 21.46) |
|         |      | ≥65   | 44,234 | 4,292,708 | 1030.45 | (1020.84, 1040.05) | 7,555 | 17.08 | (16.69, 17.46) |
| 2016/17 | MRDx | 50-64 | 7,426  | 5,878,677 | 126.32  | (123.45, 129.19)   | 314   | 4.23  | (3.76, 4.70)   |
|         |      | 65-74 | 8,059  | 2,540,142 | 317.27  | (310.34, 324.19)   | 519   | 6.44  | (5.89, 6.99)   |
|         |      | 75-84 | 10,731 | 1,320,512 | 812.64  | (797.26, 828.02)   | 1,063 | 9.91  | (9.31, 10.50)  |
|         |      | ≥85   | 12,827 | 583,374   | 2198.76 | (2160.71, 2236.81) | 1,880 | 14.66 | (13.99, 15.32) |
|         |      | ≥65   | 31,617 | 4,444,028 | 711.45  | (703.61, 719.29)   | 3,462 | 10.95 | (10.59, 11.31) |
|         | ODx  | 50-64 | 10,706 | 5,878,677 | 182.12  | (178.67, 185.57)   | 1,185 | 11.07 | (10.44, 11.70) |
|         |      | 65-74 | 13,766 | 2,540,142 | 541.94  | (532.89, 550.99)   | 1,894 | 13.76 | (13.14, 14.38) |
|         |      | 75-84 | 17,440 | 1,320,512 | 1320.70 | (1301.10, 1340.30) | 2,871 | 16.46 | (15.86, 17.06) |
|         |      | ≥85   | 15,210 | 583,374   | 2607.25 | (2565.81, 2648.68) | 3,260 | 21.43 | (20.70, 22.17) |
|         |      | ≥65   | 46,416 | 4,444,028 | 1044.46 | (1034.96, 1053.96) | 8,025 | 17.29 | (16.91, 17.67) |
| 2017/18 | MRDx | 50-64 | 7,988  | 5,915,193 | 135.04  | (132.08, 138.00)   | 307   | 3.84  | (3.41, 4.27)   |
|         |      | 65-74 | 8,519  | 2,647,753 | 321.74  | (314.91, 328.58)   | 527   | 6.19  | (5.66, 6.71)   |
|         |      | 75-84 | 11,197 | 1,359,020 | 823.90  | (808.64, 839.16)   | 1,008 | 9.00  | (8.45, 9.56)   |
|         |      | ≥85   | 13,374 | 600,326   | 2227.79 | (2190.03, 2265.55) | 1,880 | 14.06 | (13.42, 14.69) |
|         |      | ≥65   | 33,090 | 4,607,099 | 718.24  | (710.50, 725.98)   | 3,415 | 10.32 | (9.97, 10.67)  |
|         | ODx  | 50-64 | 11,144 | 5,915,193 | 188.40  | (184.90, 191.89)   | 1,172 | 10.52 | (9.91, 11.12)  |
|         |      | 65-74 | 14,580 | 2,647,753 | 550.66  | (541.72, 559.59)   | 1,978 | 13.57 | (12.97, 14.16) |
|         |      | 75-84 | 17,700 | 1,359,020 | 1302.41 | (1283.22, 1321.60) | 2,884 | 16.29 | (15.70, 16.89) |
|         |      | ≥85   | 15,709 | 600,326   | 2616.74 | (2575.82, 2657.67) | 3,373 | 21.47 | (20.75, 22.20) |
|         |      | ≥65   | 47,989 | 4,607,099 | 1041.63 | (1032.31, 1050.95) | 8,235 | 17.16 | (16.79, 17.53) |
| 2018/19 | MRDx | 50-64 | 8,150  | 5,936,682 | 137.28  | (134.30, 140.26)   | 343   | 4.21  | (3.76, 4.65)   |
|         |      | 65-74 | 8,354  | 2,752,092 | 303.55  | (297.04, 310.06)   | 518   | 6.20  | (5.67, 6.73)   |
|         |      | 75-84 | 10,276 | 1,408,175 | 729.74  | (715.63, 743.85)   | 970   | 9.44  | (8.85, 10.03)  |
|         |      | ≥85   | 11,979 | 615,858   | 1945.09 | (1910.26, 1979.92) | 1,708 | 14.26 | (13.58, 14.93) |
|         |      | ≥65   | 30,609 | 4,776,125 | 640.88  | (633.70, 648.05)   | 3,196 | 10.44 | (10.08, 10.80) |
|         | ODx  | 50-64 | 11,205 | 5,936,682 | 188.74  | (185.25, 192.24)   | 1,234 | 11.01 | (10.40, 11.63) |
|         |      | 65-74 | 14,401 | 2,752,092 | 523.27  | (514.73, 531.82)   | 1,903 | 13.21 | (12.62, 13.81) |
|         |      | 75-84 | 16,990 | 1,408,175 | 1206.53 | (1188.38, 1224.67) | 2,863 | 16.85 | (16.23, 17.47) |



|  |     |        |           |         |                    |       |       |                |
|--|-----|--------|-----------|---------|--------------------|-------|-------|----------------|
|  | ≥85 | 14,732 | 615,858   | 2392.11 | (2353.48, 2430.74) | 3,052 | 20.72 | (19.98, 21.45) |
|  | ≥65 | 46,123 | 4,776,125 | 965.70  | (956.89, 974.51)   | 7818  | 16.95 | (16.57, 17.33) |

Notes: MRDx: most responsible diagnosis; ODx: other than most responsible diagnosis

**Supplementary Table S5.** Intensive care unit length of stay and total cost of hospitalization for all-cause community acquired pneumonia, by comorbidity, case coding and age group, fiscal year 2009-2018, Canada (excluding Quebec).

| Fiscal Year | Comorbidity | Case coding     | Age group | Number of cases | Number of cases with ICU stay | Proportion of cases with ICU stay | Length of ICU stay - median (days) | Length of total hospital stay for ICU cases - median (days) | Daily cost of hospital stay for ICU cases - average (standard deviation) | Total cost of hospital stay for ICU cases - average (standard deviation) |
|-------------|-------------|-----------------|-----------|-----------------|-------------------------------|-----------------------------------|------------------------------------|-------------------------------------------------------------|--------------------------------------------------------------------------|--------------------------------------------------------------------------|
| 2014/2015   | Present     | MRDx (N=10,609) | 50-64     | 1,506           | 360                           | 23.9%                             | 5                                  | 10                                                          | \$2,193.14 (\$1,476.29)                                                  | \$31,466.74 (\$38,942.09)                                                |
|             |             |                 | 65-74     | 1,920           | 407                           | 21.2%                             | 5                                  | 11                                                          | \$1,944.13 (\$1,348.61)                                                  | \$29,214.44 (\$36,195.67)                                                |
|             |             |                 | 75-84     | 3,165           | 468                           | 14.8%                             | 4                                  | 11                                                          | \$1,735.02 (\$1,113.34)                                                  | \$25,552.19 (\$45,989.67)                                                |
|             |             |                 | ≥85       | 4,018           | 304                           | 7.6%                              | 4                                  | 10                                                          | \$1,589.37 (\$1,089.99)                                                  | \$19,696.40 (\$26,585.79)                                                |
|             |             | ODx (N=40,637)  | 50-64     | 6,227           | 1,718                         | 27.6%                             | 5                                  | 11                                                          | \$2,387.16 (\$1,728.40)                                                  | \$39,932.23 (\$78,951.61)                                                |
|             |             |                 | 65-74     | 9,540           | 2,168                         | 22.7%                             | 5                                  | 11                                                          | \$2,070.34 (\$1,468.20)                                                  | \$31,915.99 (\$46,617.99)                                                |
|             |             |                 | 75-84     | 13,663          | 2,247                         | 16.4%                             | 5                                  | 11                                                          | \$1,874.34 (\$1,395.01)                                                  | \$28,977.59 (\$47,884.02)                                                |
|             |             |                 | ≥85       | 11,207          | 1,017                         | 9.1%                              | 4                                  | 11                                                          | \$1,570.08 (\$1,161.68)                                                  | \$21,902.10 (\$30,951.02)                                                |
|             | Absent      | MRDx (N=27,061) | 50-64     | 5,494           | 400                           | 7.3%                              | 4                                  | 8                                                           | \$1,698.86 (\$1,280.57)                                                  | \$19,896.37 (\$32,543.96)                                                |
|             |             |                 | 65-74     | 5,379           | 320                           | 5.9%                              | 3                                  | 8                                                           | \$1,574.91 (\$1,395.22)                                                  | \$19,497.25 (\$36,074.89)                                                |
|             |             |                 | 75-84     | 7,510           | 298                           | 4.0%                              | 3                                  | 7                                                           | \$1,570.34 (\$1,562.73)                                                  | \$15,636.72 (\$20,212.67)                                                |
|             |             |                 | ≥85       | 8,678           | 154                           | 1.8%                              | 3                                  | 9                                                           | \$1,313.28 (\$1,076.71)                                                  | \$16,784.09 (\$36,085.88)                                                |
|             |             | ODx (N=10,205)  | 50-64     | 2,402           | 422                           | 17.6%                             | 4                                  | 11                                                          | \$2,186.14 (\$1,474.88)                                                  | \$34,056.84 (\$43,996.80)                                                |
|             |             |                 | 65-74     | 2,269           | 276                           | 12.2%                             | 4                                  | 11                                                          | \$2,026.85 (\$1,359.82)                                                  | \$32,229.76 (\$43,503.10)                                                |
|             |             |                 | 75-84     | 2,676           | 212                           | 7.9%                              | 3                                  | 11                                                          | \$1,834.73 (\$1,210.33)                                                  | \$27,022.48 (\$31,930.01)                                                |
|             |             |                 | ≥85       | 2,858           | 94                            | 3.3%                              | 3                                  | 11                                                          | \$1,751.30 (\$1,173.50)                                                  | \$22,267.41 (\$23,307.27)                                                |
| 2015/2016   | Present     | MRDx (N=10,553) | 50-64     | 1,736           | 500                           | 28.8%                             | 5                                  | 10                                                          | \$2,324.22 (\$1,541.10)                                                  | \$32,097.11 (\$37,160.94)                                                |
|             |             |                 | 65-74     | 2,013           | 444                           | 22.1%                             | 4                                  | 10                                                          | \$2,168.24 (\$1,657.00)                                                  | \$28,806.38 (\$42,438.00)                                                |
|             |             |                 | 75-84     | 3,120           | 491                           | 15.7%                             | 4                                  | 10                                                          | \$1,997.37 (\$1,334.51)                                                  | \$26,041.89 (\$31,421.03)                                                |
|             |             |                 | ≥85       | 3,684           | 302                           | 8.2%                              | 3                                  | 10                                                          | \$1,526.06 (\$1,176.48)                                                  | \$23,394.96 (\$39,815.17)                                                |
|             |             | ODx (N=43,075)  | 50-64     | 7,615           | 2,465                         | 32.4%                             | 5                                  | 11                                                          | \$2,524.78 (\$1,827.90)                                                  | \$40,781.91 (\$57,825.43)                                                |
|             |             |                 | 65-74     | 10,608          | 2,918                         | 27.5%                             | 5                                  | 11                                                          | \$2,222.86 (\$1,664.06)                                                  | \$37,320.95 (\$66,136.46)                                                |
|             |             |                 | 75-84     | 13,601          | 2,551                         | 18.8%                             | 5                                  | 11                                                          | \$1,963.85 (\$1,450.33)                                                  | \$31,733.49 (\$46,315.14)                                                |
|             |             |                 | ≥85       | 11,251          | 1,209                         | 10.7%                             | 4                                  | 11                                                          | \$1,622.34 (\$1,175.03)                                                  | \$24,094.71 (\$49,148.07)                                                |
|             | Absent      | MRDx (N=26,405) | 50-64     | 6,158           | 498                           | 8.1%                              | 3                                  | 7                                                           | \$1,769.38 (\$1,219.46)                                                  | \$18,739.74 (\$28,786.72)                                                |
|             |             |                 | 65-74     | 5,488           | 346                           | 6.3%                              | 3                                  | 7                                                           | \$1,649.48 (\$1,156.77)                                                  | \$17,095.78 (\$30,835.93)                                                |
|             |             |                 | 75-84     | 7,063           | 298                           | 4.2%                              | 3                                  | 7                                                           | \$1,426.65 (\$939.77)                                                    | \$15,002.94 (\$27,995.91)                                                |

|           |         |                    |       |        |       |       |   |    |                            |                              |
|-----------|---------|--------------------|-------|--------|-------|-------|---|----|----------------------------|------------------------------|
|           |         |                    | ≥85   | 7,696  | 150   | 1.9%  | 2 | 7  | \$1,519.57<br>(\$970.33)   | \$13,095.09<br>(\$15,065.09) |
|           |         |                    | 50-64 | 3,132  | 666   | 21.3% | 4 | 10 | \$2,331.38<br>(\$1,618.37) | \$38,125.41<br>(\$57,119.51) |
|           |         |                    | 65-74 | 2,663  | 377   | 14.2% | 4 | 11 | \$2,059.97<br>(\$1,266.59) | \$35,952.64<br>(\$53,698.69) |
|           |         |                    | 75-84 | 3,068  | 305   | 9.9%  | 3 | 11 | \$1,802.18<br>(\$1,241.49) | \$29,639.41<br>(\$53,077.46) |
|           |         |                    | ≥85   | 3,043  | 130   | 4.3%  | 2 | 9  | \$1,525.53<br>(\$1,054.10) | \$21,183.66<br>(\$26,569.24) |
| 2016/2017 | Present | MRDx<br>(N=11,328) | 50-64 | 1,688  | 521   | 30.9% | 5 | 10 | \$2,324.45<br>(\$1,618.14) | \$31,316.81<br>(\$40,169.18) |
|           |         |                    | 65-74 | 2,153  | 495   | 23.0% | 4 | 10 | \$2,152.13<br>(\$1,495.13) | \$29,278.91<br>(\$36,230.24) |
|           |         |                    | 75-84 | 3,261  | 502   | 15.4% | 4 | 10 | \$1,895.39<br>(\$1,236.85) | \$28,618.01<br>(\$39,871.44) |
|           |         |                    | ≥85   | 4,226  | 337   | 8.0%  | 4 | 10 | \$1,607.63<br>(\$1,117.57) | \$19,055.35<br>(\$21,499.66) |
|           |         | ODx<br>(N=44,642)  | 50-64 | 7,604  | 2,533 | 33.3% | 5 | 11 | \$2,451.86<br>(\$1,737.21) | \$39,968.82<br>(\$59,825.52) |
|           |         |                    | 65-74 | 10,959 | 2,967 | 27.1% | 5 | 11 | \$2,219.33<br>(\$1,487.97) | \$37,397.91<br>(\$60,113.64) |
|           |         |                    | 75-84 | 14,189 | 2,649 | 18.7% | 4 | 11 | \$1,942.00<br>(\$1,354.10) | \$31,280.91<br>(\$58,205.01) |
|           |         |                    | ≥85   | 11,890 | 1,239 | 10.4% | 4 | 10 | \$1,686.06<br>(\$1,483.89) | \$23,422.93<br>(\$40,147.14) |
|           | Absent  | MRDx<br>(N=27,715) | 50-64 | 5,738  | 442   | 7.7%  | 3 | 7  | \$1,773.48<br>(\$1,427.84) | \$18,308.91<br>(\$25,619.91) |
|           |         |                    | 65-74 | 5,906  | 340   | 5.8%  | 3 | 7  | \$1,672.25<br>(\$1,177.42) | \$17,946.94<br>(\$27,848.40) |
|           |         |                    | 75-84 | 7,470  | 270   | 3.6%  | 3 | 7  | \$1,611.48<br>(\$1,355.88) | \$15,291.40<br>(\$20,591.13) |
|           |         |                    | ≥85   | 8,601  | 162   | 1.9%  | 3 | 8  | \$1,244.72<br>(\$854.20)   | \$11,781.83<br>(\$14,037.36) |
|           |         | ODx<br>(N=12,480)  | 50-64 | 3,102  | 647   | 20.9% | 4 | 11 | \$2,251.55<br>(\$1,586.70) | \$39,543.23<br>(\$55,400.46) |
|           |         |                    | 65-74 | 2,807  | 436   | 15.5% | 4 | 10 | \$2,005.13<br>(\$1,975.85) | \$28,615.00<br>(\$36,559.30) |
|           |         |                    | 75-84 | 3,251  | 374   | 11.5% | 3 | 11 | \$1,907.90<br>(\$1,330.64) | \$27,883.48<br>(\$39,282.07) |
|           |         |                    | ≥85   | 3,320  | 163   | 4.9%  | 3 | 10 | \$1,583.58<br>(\$1,039.24) | \$20,740.64<br>(\$26,802.12) |
| 2017/2018 | Present | MRDx<br>(N=12,021) | 50-64 | 1,812  | 530   | 29.2% | 5 | 9  | \$2,479.00<br>(\$4,447.52) | \$29,231.32<br>(\$38,635.72) |
|           |         |                    | 65-74 | 2,385  | 538   | 22.6% | 5 | 11 | \$2,216.45<br>(\$1,482.53) | \$30,678.46<br>(\$36,923.98) |
|           |         |                    | 75-84 | 3,397  | 508   | 15.0% | 4 | 10 | \$1,921.66<br>(\$1,312.70) | \$26,089.29<br>(\$46,716.83) |
|           |         |                    | ≥85   | 4,427  | 389   | 8.8%  | 3 | 10 | \$1,603.02<br>(\$1,087.23) | \$16,740.89<br>(\$17,077.68) |
|           |         | ODx<br>(N=46,139)  | 50-64 | 7,951  | 2,666 | 33.5% | 5 | 11 | \$2,559.66<br>(\$1,809.53) | \$39,891.57<br>(\$64,704.55) |
|           |         |                    | 65-74 | 11,580 | 3,023 | 26.1% | 5 | 11 | \$2,250.14<br>(\$1,504.90) | \$34,959.03<br>(\$49,984.97) |
|           |         |                    | 75-84 | 14,373 | 2,772 | 19.3% | 4 | 11 | \$1,998.91<br>(\$1,568.41) | \$32,919.60<br>(\$60,653.37) |
|           |         |                    | ≥85   | 12,235 | 1,350 | 11.0% | 4 | 11 | \$1,698.48<br>(\$1,233.88) | \$24,438.88<br>(\$43,218.16) |
|           | Absent  | MRDx<br>(N=29,057) | 50-64 | 6,176  | 444   | 7.2%  | 3 | 7  | \$1,914.22<br>(\$1,606.13) | \$18,299.26<br>(\$31,032.36) |
|           |         |                    | 65-74 | 6,134  | 361   | 5.9%  | 3 | 7  | \$1,712.85<br>(\$1,233.72) | \$18,305.97<br>(\$31,485.05) |
|           |         |                    | 75-84 | 7,800  | 293   | 3.8%  | 3 | 8  | \$1,590.42<br>(\$1,218.47) | \$18,400.66<br>(\$30,983.71) |
|           |         |                    | ≥85   | 8,947  | 154   | 1.7%  | 2 | 8  | \$1,357.76<br>(\$1,013.31) | \$15,093.28<br>(\$23,904.48) |

|           |         |                    |                    |        |       |       |       |    |                            |                              |                              |
|-----------|---------|--------------------|--------------------|--------|-------|-------|-------|----|----------------------------|------------------------------|------------------------------|
| 2018/2019 |         | ODx<br>(N=12,994)  | 50-64              | 3,193  | 664   | 20.8% | 4     | 10 | \$2,309.61<br>(\$1,481.58) | \$36,529.85<br>(\$56,742.15) |                              |
|           |         |                    | 65-74              | 3,000  | 436   | 14.5% | 4     | 10 | \$2,302.18<br>(\$2,114.59) | \$35,379.00<br>(\$50,747.41) |                              |
|           |         |                    | 75-84              | 3,327  | 316   | 9.5%  | 3     | 11 | \$1,802.58<br>(\$1,084.04) | \$26,155.76<br>(\$30,546.26) |                              |
|           |         |                    | ≥85                | 3,474  | 161   | 4.6%  | 3     | 9  | \$1,914.79<br>(\$1,307.81) | \$22,782.09<br>(\$29,698.66) |                              |
|           |         |                    |                    |        |       |       |       |    |                            |                              |                              |
|           | Present | MRDx<br>(N=11,467) | 50-64              | 1,857  | 529   | 28.5% | 5     | 10 | \$2,431.22<br>(\$1,858.09) | \$34,468.89<br>(\$42,293.78) |                              |
|           |         |                    | 65-74              | 2,301  | 517   | 22.5% | 5     | 10 | \$2,053.14<br>(\$1,285.05) | \$29,482.20<br>(\$39,605.62) |                              |
|           |         |                    | 75-84              | 3,180  | 514   | 16.2% | 4     | 11 | \$1,904.32<br>(\$1,250.60) | \$28,262.62<br>(\$40,550.58) |                              |
|           |         |                    | ≥85                | 4,129  | 350   | 8.5%  | 4     | 11 | \$1,537.86<br>(\$1,071.96) | \$25,949.64<br>(\$70,718.41) |                              |
|           |         | ODx<br>(N=44,608)  | 50-64              | 8,023  | 2,725 | 34.0% | 5     | 11 | \$2,601.09<br>(\$2,074.57) | \$41,839.16<br>(\$58,293.89) |                              |
|           |         |                    | 65-74              | 11,466 | 3,061 | 26.7% | 5     | 11 | \$2,258.20<br>(\$1,489.29) | \$37,232.93<br>(\$67,820.33) |                              |
|           |         |                    | 75-84              | 13,717 | 2,665 | 19.4% | 4     | 11 | \$2,031.28<br>(\$1,411.95) | \$34,639.84<br>(\$61,729.12) |                              |
|           |         |                    | ≥85                | 11,402 | 1,238 | 10.9% | 4     | 11 | \$1,741.29<br>(\$1,383.45) | \$26,073.95<br>(\$42,085.72) |                              |
|           |         | Absent             | MRDx<br>(N=27,292) | 50-64  | 6,293 | 493   | 7.8%  | 3  | 7                          | \$1,969.66<br>(\$1,458.66)   | \$22,082.92<br>(\$34,357.27) |
|           |         |                    |                    | 65-74  | 6,053 | 360   | 5.9%  | 3  | 8                          | \$1,586.58<br>(\$1,113.19)   | \$16,797.06<br>(\$25,930.36) |
|           |         |                    |                    | 75-84  | 7,096 | 286   | 4.0%  | 3  | 8                          | \$1,667.30<br>(\$1,230.49)   | \$17,362.88<br>(\$26,783.23) |
|           |         |                    |                    | ≥85    | 7,850 | 160   | 2.0%  | 2  | 8                          | \$1,474.23<br>(\$1,430.95)   | \$13,438.01<br>(\$15,393.63) |
|           |         |                    | ODx<br>(N=12,720)  | 50-64  | 3,182 | 603   | 19.0% | 4  | 11                         | \$2,454.14<br>(\$1,667.17)   | \$34,902.43<br>(\$43,119.58) |
|           |         |                    |                    | 65-74  | 2,935 | 437   | 14.9% | 4  | 10                         | \$2,220.14<br>(\$1,675.02)   | \$32,856.57<br>(\$50,708.57) |
|           |         |                    |                    | 75-84  | 3,273 | 328   | 10.0% | 3  | 10                         | \$1,975.19<br>(\$1,290.20)   | \$27,692.54<br>(\$44,568.48) |
|           |         |                    |                    | ≥85    | 3,330 | 178   | 5.3%  | 3  | 9                          | \$1,856.61<br>(\$1,745.90)   | \$21,073.90<br>(\$23,532.19) |

Notes: MRDx: most responsible diagnosis; ODx: other than most responsible diagnosis

**Supplementary Table S6.** Length of stay and total cost of hospitalization for all-cause community acquired pneumonia, by comorbidity, case coding and age group, fiscal year 2009-2018, Canada (excluding Quebec).

| Fiscal Year | Comorbidity | Case coding | Age group | Number of cases | Length of stay - median (days) | Daily cost of hospital stay - average (standard deviation) | Total cost of hospital stay - average (standard deviation) |
|-------------|-------------|-------------|-----------|-----------------|--------------------------------|------------------------------------------------------------|------------------------------------------------------------|
| 2014/2015   | Present     | MRDx        | 50-64     | 1,506           | 6                              | \$1,721.19 (\$1,304.94)                                    | \$13,724.37 (\$22,310.69)                                  |
|             |             |             | 65-74     | 1,920           | 6                              | \$1,636.84 (\$1,267.78)                                    | \$13,059.69 (\$20,847.22)                                  |
|             |             |             | 75-84     | 3,165           | 7                              | \$1,395.90 (\$1,093.81)                                    | \$11,802.54 (\$21,413.25)                                  |
|             |             |             | ≥85       | 4,018           | 8                              | \$1,230.91 (\$968.94)                                      | \$11,197.28 (\$15,276.39)                                  |
|             |             | ODx         | 50-64     | 6,227           | 6                              | \$1,869.81 (\$1,524.03)                                    | \$17,945.43 (\$46,035.23)                                  |
|             |             |             | 65-74     | 9,540           | 7                              | \$1,631.40 (\$1,292.66)                                    | \$15,396.24 (\$31,166.90)                                  |
|             |             |             | 75-84     | 13,663          | 7                              | \$1,445.87 (\$1,189.47)                                    | \$13,840.80 (\$24,765.78)                                  |
|             |             |             | ≥85       | 11,207          | 8                              | \$1,293.38 (\$1,088.76)                                    | \$12,600.75 (\$18,087.91)                                  |
|             | Absent      | MRDx        | 50-64     | 5,494           | 4                              | \$1,547.36 (\$1,176.16)                                    | \$6,812.42 (\$12,512.61)                                   |
|             |             |             | 65-74     | 5,379           | 5                              | \$1,419.70 (\$1,096.77)                                    | \$6,997.78 (\$12,635.92)                                   |
|             |             |             | 75-84     | 7,510           | 5                              | \$1,310.47 (\$1,073.90)                                    | \$7,157.52 (\$11,596.94)                                   |
|             |             |             | ≥85       | 8,678           | 6                              | \$1,184.23 (\$974.45)                                      | \$8,036.77 (\$13,565.37)                                   |
|             |             | ODx         | 50-64     | 2,402           | 7                              | \$1,688.05 (\$1,434.62)                                    | \$16,092.10 (\$26,175.57)                                  |
|             |             |             | 65-74     | 2,269           | 8                              | \$1,482.57 (\$1,226.27)                                    | \$14,961.28 (\$23,798.20)                                  |
|             |             |             | 75-84     | 2,676           | 9                              | \$1,360.05 (\$1,178.20)                                    | \$14,012.47 (\$20,284.48)                                  |
|             |             |             | ≥85       | 2,858           | 10                             | \$1,236.48 (\$1,207.05)                                    | \$14,364.40 (\$20,122.74)                                  |
| 2015/2016   | Present     | MRDx        | 50-64     | 1,736           | 6                              | \$1,839.49 (\$1,462.37)                                    | \$14,985.50 (\$23,428.30)                                  |
|             |             |             | 65-74     | 2,013           | 6                              | \$1,667.52 (\$1,394.71)                                    | \$13,283.80 (\$23,372.40)                                  |
|             |             |             | 75-84     | 3,120           | 7                              | \$1,452.25 (\$1,116.17)                                    | \$12,069.98 (\$16,913.53)                                  |
|             |             |             | ≥85       | 3,684           | 8                              | \$1,248.72 (\$960.83)                                      | \$11,671.53 (\$17,301.86)                                  |
|             |             | ODx         | 50-64     | 7,615           | 6                              | \$1,984.93 (\$1,646.74)                                    | \$20,137.81 (\$39,747.92)                                  |
|             |             |             | 65-74     | 10,608          | 7                              | \$1,718.20 (\$1,435.94)                                    | \$17,742.95 (\$39,013.86)                                  |
|             |             |             | 75-84     | 13,601          | 7                              | \$1,509.78 (\$1,187.95)                                    | \$15,042.86 (\$26,645.01)                                  |
|             |             |             | ≥85       | 11,251          | 8                              | \$1,336.47 (\$1,069.15)                                    | \$13,265.27 (\$24,415.88)                                  |
|             | Absent      | MRDx        | 50-64     | 6,158           | 4                              | \$1,577.68 (\$1,201.85)                                    | \$6,999.10 (\$10,841.42)                                   |
|             |             |             | 65-74     | 5,488           | 4                              | \$1,485.31 (\$1,165.92)                                    | \$6,940.17 (\$11,283.78)                                   |
|             |             |             | 75-84     | 7,063           | 5                              | \$1,337.17 (\$1,059.32)                                    | \$7,333.89 (\$11,304.04)                                   |
|             |             |             | ≥85       | 7,696           | 6                              | \$1,214.56 (\$998.06)                                      | \$8,153.02 (\$13,566.27)                                   |
|             |             | ODx         | 50-64     | 3,132           | 7                              | \$1,803.35 (\$1,485.68)                                    | \$18,045.74 (\$32,125.86)                                  |
|             |             |             | 65-74     | 2,663           | 8                              | \$1,598.84 (\$1,393.40)                                    | \$15,684.44 (\$25,217.61)                                  |
|             |             |             | 75-84     | 3,068           | 8                              | \$1,422.34 (\$1,270.44)                                    | \$15,047.49 (\$27,451.48)                                  |
|             |             |             | ≥85       | 3,043           | 9                              | \$1,319.81 (\$1,264.98)                                    | \$14,067.69 (\$18,352.67)                                  |
| 2016/2017   | Present     | MRDx        | 50-64     | 1,688           | 6                              | \$1,885.11 (\$1,578.35)                                    | \$15,733.69 (\$26,983.55)                                  |
|             |             |             | 65-74     | 2,153           | 6                              | \$1,717.99 (\$1,532.66)                                    | \$13,638.17 (\$21,349.16)                                  |
|             |             |             | 75-84     | 3,261           | 7                              | \$1,481.68 (\$1,138.03)                                    | \$12,359.67 (\$19,842.93)                                  |
|             |             |             | ≥85       | 4,226           | 8                              | \$1,305.63 (\$1,056.29)                                    | \$10,727.28 (\$12,875.89)                                  |

|           |         |      |       |        |   |                         |                           |
|-----------|---------|------|-------|--------|---|-------------------------|---------------------------|
|           |         | ODx  | 50-64 | 7,604  | 7 | \$1,944.56 (\$1,539.65) | \$20,052.05 (\$39,786.23) |
|           |         |      | 65-74 | 10,959 | 7 | \$1,748.28 (\$1,359.11) | \$17,555.17 (\$35,917.82) |
|           |         |      | 75-84 | 14,189 | 7 | \$1,540.77 (\$1,246.51) | \$14,895.88 (\$30,088.98) |
|           |         |      | ≥85   | 11,890 | 8 | \$1,347.49 (\$1,122.90) | \$12,914.46 (\$20,513.49) |
|           | Absent  | MRDx | 50-64 | 5,738  | 4 | \$1,587.35 (\$1,246.28) | \$7,042.45 (\$16,824.30)  |
|           |         |      | 65-74 | 5,906  | 4 | \$1,491.85 (\$1,166.80) | \$6,963.37 (\$11,622.93)  |
|           |         |      | 75-84 | 7,470  | 5 | \$1,364.97 (\$1,087.17) | \$7,378.42 (\$13,537.54)  |
|           |         |      | ≥85   | 8,601  | 6 | \$1,236.07 (\$985.05)   | \$7,694.43 (\$11,162.14)  |
|           |         | ODx  | 50-64 | 3,102  | 7 | \$1,808.84 (\$1,584.05) | \$18,825.08 (\$34,316.90) |
|           |         |      | 65-74 | 2,807  | 7 | \$1,636.07 (\$1,533.71) | \$15,866.19 (\$22,093.74) |
|           |         |      | 75-84 | 3,251  | 8 | \$1,444.64 (\$1,247.76) | \$14,757.08 (\$22,597.76) |
|           |         |      | ≥85   | 3,320  | 9 | \$1,293.79 (\$1,176.67) | \$14,403.79 (\$19,025.05) |
| 2017/2018 | Present | MRDx | 50-64 | 1,812  | 6 | \$1,960.19 (\$2,733.37) | \$14,501.72 (\$24,164.07) |
|           |         |      | 65-74 | 2,385  | 6 | \$1,762.88 (\$1,321.99) | \$14,033.85 (\$21,677.27) |
|           |         |      | 75-84 | 3,397  | 7 | \$1,523.33 (\$1,233.15) | \$12,082.01 (\$21,986.01) |
|           |         |      | ≥85   | 4,427  | 8 | \$1,340.70 (\$1,140.07) | \$11,108.37 (\$13,540.38) |
|           |         | ODx  | 50-64 | 7,951  | 6 | \$2,060.34 (\$1,654.39) | \$20,246.61 (\$41,666.43) |
|           |         |      | 65-74 | 11,580 | 7 | \$1,790.77 (\$1,454.56) | \$16,976.21 (\$30,572.21) |
|           |         |      | 75-84 | 14,373 | 7 | \$1,571.55 (\$1,325.33) | \$15,496.81 (\$32,157.12) |
|           |         |      | ≥85   | 12,235 | 8 | \$1,396.88 (\$1,157.50) | \$13,429.76 (\$21,161.76) |
|           | Absent  | MRDx | 50-64 | 6,176  | 4 | \$1,646.91 (\$1,295.71) | \$6,832.04 (\$10,496.26)  |
|           |         |      | 65-74 | 6,134  | 4 | \$1,513.67 (\$1,185.10) | \$6,973.98 (\$10,495.47)  |
|           |         |      | 75-84 | 7,800  | 5 | \$1,391.90 (\$1,124.61) | \$7,431.26 (\$11,606.47)  |
|           |         |      | ≥85   | 8,947  | 6 | \$1,274.39 (\$1,062.38) | \$7,832.42 (\$11,368.13)  |
|           |         | ODx  | 50-64 | 3,193  | 7 | \$1,888.01 (\$1,563.22) | \$17,916.89 (\$31,903.04) |
|           |         |      | 65-74 | 3,000  | 7 | \$1,646.25 (\$1,473.52) | \$16,194.82 (\$26,001.68) |
|           |         |      | 75-84 | 3,327  | 8 | \$1,471.78 (\$1,243.44) | \$15,131.32 (\$26,076.49) |
|           |         |      | ≥85   | 3,474  | 9 | \$1,342.64 (\$1,246.23) | \$13,925.39 (\$19,043.59) |
| 2018/2019 | Present | MRDx | 50-64 | 1,857  | 6 | \$1,912.71 (\$1,571.20) | \$15,821.86 (\$26,186.46) |
|           |         |      | 65-74 | 2,301  | 6 | \$1,714.87 (\$1,264.60) | \$14,450.42 (\$26,142.72) |
|           |         |      | 75-84 | 3,180  | 7 | \$1,544.89 (\$1,242.08) | \$13,118.43 (\$20,599.69) |
|           |         |      | ≥85   | 4,129  | 8 | \$1,321.53 (\$1,068.66) | \$12,040.72 (\$24,335.70) |
|           |         | ODx  | 50-64 | 8,023  | 7 | \$2,066.88 (\$1,744.06) | \$20,876.27 (\$39,159.70) |
|           |         |      | 65-74 | 11,466 | 7 | \$1,813.77 (\$1,455.29) | \$17,919.41 (\$39,864.92) |
|           |         |      | 75-84 | 13,717 | 7 | \$1,617.39 (\$1,279.52) | \$16,078.68 (\$32,614.42) |
|           |         |      | ≥85   | 11,402 | 8 | \$1,407.16 (\$1,213.96) | \$13,964.14 (\$21,616.16) |
|           | Absent  | MRDx | 50-64 | 6,293  | 4 | \$1,657.31 (\$1,298.13) | \$7,372.90 (\$12,705.08)  |
|           |         |      | 65-74 | 6,053  | 4 | \$1,517.31 (\$1,184.41) | \$6,940.08 (\$10,379.49)  |
|           |         |      | 75-84 | 7,096  | 5 | \$1,441.90 (\$1,185.71) | \$7,374.10 (\$11,792.05)  |
|           |         |      | ≥85   | 7,850  | 6 | \$1,306.37 (\$1,099.42) | \$7,894.14 (\$10,717.33)  |

|  |     |       |       |   |                         |                           |
|--|-----|-------|-------|---|-------------------------|---------------------------|
|  | ODx | 50-64 | 3,182 | 7 | \$1,898.97 (\$1,550.50) | \$18,028.12 (\$28,990.44) |
|  |     | 65-74 | 2,935 | 8 | \$1,699.59 (\$1,568.40) | \$16,307.77 (\$26,396.27) |
|  |     | 75-84 | 3,273 | 8 | \$1,489.30 (\$1,308.78) | \$16,088.98 (\$25,686.36) |
|  |     | ≥85   | 3,330 | 8 | \$1,393.78 (\$1,368.24) | \$13,608.58 (\$16,804.42) |

Notes: MRDx: most responsible diagnosis; ODx: other than most responsible diagnosis
